# Supplementary material for: Acclimatory responses of the Daphnia pulex proteome to environmental changes. II. Chronic exposure to different temperatures (10 and 20°C) mainly affects protein metabolism
Source: PubMed Central journal article supplement (PMC2678069; doi:10.1186/1472-6793-9-8), 2009-04-21
Supplement: 1472-6793-9-8-S1.pdf [file 1472-6793-9-8-S1.pdf]

T-COFFEE, Version\_5.49Wed Dec 19 12:12:01 2007

Cedric Notredame

CPU TIME:34 sec.

SCORE=56

\*

**BAD** **AVG** **GOOD**

\*

|       |   |    |
|-------|---|----|
| PSS   | : | 57 |
| TAAe  | : | 54 |
| TAFi  | : | 55 |
| TAS   | : | 51 |
| TBT   | : | 55 |
| TSS   | : | 57 |
| TDM   | : | 50 |
| TLS1  | : | 53 |
| TLS7  | : | 54 |
| TNV   | : | 53 |
| TPC   | : | 57 |
| TPV   | : | 58 |
| TPL   | : | 58 |
| TRY1  | : | 46 |
| TRY2  | : | 53 |
| TRY3  | : | 53 |
| TRY4A | : | 57 |
| TRY4B | : | 55 |
| TRY5A | : | 55 |
| TRY5B | : | 59 |
| TRY5K | : | 58 |
| TRY5C | : | 58 |
| TRY5D | : | 56 |
| TRY5E | : | 56 |
| TRY5F | : | 59 |
| TRY5L | : | 59 |
| TRY5G | : | 59 |
| TRY5I | : | 58 |
| TRY5H | : | 57 |
| TRY5J | : | 59 |
| TRY5M | : | 56 |
| TTC   | : | 53 |
| ChBT  | : | 57 |
| ChPO  | : | 54 |
| cons  | : | 56 |

```

PSS      -M-NS-F-TIL-IV--TYFSLAF---GS-RCGI-----
TAAe
TAFi
TAS      MSNKI-AILLAILVAVVACVEVQ---ASQRPR---TARPLPHFLP---RPQ
TBT      --MHP--LLIL-AF---VGAAVAF---PS-----
TSS      -MIS--LVFV-LL---IGAAFA-----
TDM      -MLKI--VILL-SA---VVCALGG---TVPEGL---LPQL-----
TLS1     --MNK-FISALFFL--VATALAK---PN-DGI---TKSIMDM---RLMYP
TLS7     --RFF--CAL-LFL---VVAANAV---PPQ---IKYSESFMRV---KSMR
TNV      ---MLICN---AFCYVAAMTAEMQLEQAC---RPNIVIAVQTL---AKFSL
TPC      --MKY--LVFC-LL---LGAAFAA---PSR-KP---TFRRG-----
TPV      --S--LVLC-LL---LAGAFAA---PSR-KP---TFRRG-----
TPL      PAMKT--LVFC-LL---LVGALAA---PSRRL---RFPP-----
TRY1     -MCRF--LFIF-LL---WNYATR---DTA---SIADAP
TRY2     --MKI--YLVLLT--VFTVTTA---SS---LARFPLSVFLD---TELI
TRY3     -MAKLVAIVGAIC--VQCFFAL---PS---PGRNDLVWR
TRY4A    --MKF--LILVCC--LLSCAAG---NSL---FPRLPL-FYRT---DQPS
TRY4B    -MKSA--LILLIV--LVAGATA---KLT---LPRLPLNVLMR---GGWP
TRY5A    -MMKH--SILV-TL---FACVLAV--GAAPS-----
TRY5B    -MNKI--ILLA-AL---FACAYAA---PQ-RMV---LPRLPAKVILN---GKYQ
TRY5K    -MNKI--ILLA-AL---FACAHAA---PH-HMV---LPRPPANVILN---GQYQ
TRY5C    -MNKI--VILA-LL--YFACIHAV---PQ-RMV---LPRLPASVILS---GKYQ
TRY5D    --MKL--ILLA-TF---VACAFGA---PH-RMV---LPRLPVSVILT---GKFQ
TRY5E    --MKI--IVLA-AF---FAFALAM---PK-RMV---LPRLPAAVMMS---GKYQ
TRY5F    --MKI--VILA-AL---FACAMAM---PK-RMV---LPRLPASVIMS---GKYQ
TRY5L    --MKI--VILA-VL---FACAMAM---PK-RMI---MPRLPASVIMK---GKYQ
TRY5G    --MKF--LVLA-AL---FACACAL---PQ-RMV---LPRLPASVISK---GKFQ
TRY5I    --MKF--VVLA-TL---LTYSWAA---PH-PPI---LPRLPIKDIVS---G-HQ
TRY5H    --MKC--FLLA-TL---LVFAWAA---PQGRAV---LPRLPLNIILN---KRFQ
TRY5J    --MKF--VILAATI--LACVIAN---PSTRSV---LPRLPLKVLLS---GKFQ
TRY5M    --MKT--VVLLATF--VVCCSTV---IS-ESVTS-SPHRASLIMN-NRGSYQ
TTC      --MKS--FLLIVFL--VATASAV---PS-YL-----RTNS
ChBT
ChPO     --MGI--LSCL-AF---AGAAYGCGSP

```

cons 

|       |                                                       |
|-------|-------------------------------------------------------|
| PSS   | -----KNGPMLDEFNR                                      |
| TAAe  | -----TMVERSDSSGR                                      |
| TAFi  | -----LVPESK                                           |
| TAS   | -----YSVGHR                                           |
| TBT   | -----DDDDK                                            |
| TSS   | -----TEDDK                                            |
| TDM   | -----DGR                                              |
| TLS1  | -----NQFDGR                                           |
| TLS7  | -----HRFGGR                                           |
| TNV   | QIKISVFEADTCGVLANCLTFFYYTLIFLNFVLIFAIARTVALGVSNDPDDGR |
| TPC   | -----LNK                                              |
| TPV   | -----LNK                                              |
| TPL   | -----NNYK                                             |
| TRY1  | -----ALRPTR                                           |
| TRY2  | -----RTKRDGR                                          |
| TRY3  | -----RKAATPL                                          |
| TRY4A | -----LLSGEK                                           |
| TRY4B | -----MIDDER                                           |
| TRY5A | -----RDNK                                             |
| TRY5B | -----LIPEDK                                           |
| TRY5K | -----LIPEDK                                           |
| TRY5C | -----LIPEDK                                           |
| TRY5D | -----FVPEDK                                           |
| TRY5E | -----LIPKDK                                           |
| TRY5F | -----LIPEDK                                           |
| TRY5L | -----LIPEDR                                           |
| TRY5G | -----LIPSNK                                           |
| TRY5I | -----LKLSEK                                           |
| TRY5H | -----NAISSDR                                          |
| TRY5J | -----MIPEDK                                           |
| TRY5M | -----RIPQEK                                           |
| TTC   | -----LLPDGR                                           |
| ChBT  | -----AIQPVLSGLSR                                      |
| ChPO  | -----AIPPVITGYSR                                      |
| cons  | -----                                                 |

```
PSS IVGGEEAEPGEFPWQISLQVVS - W - - - - - YG - - SYHYCGGSILDES WVVTAAH
TAAe IVGGFEVPVVEEVPFQVSLSGVG - - - - - - - - - - - SSHFCGGSLLSERWVMTAGH
TAFi IVGGDPVNKGDVPWQVSLQREG - F - - - - - FG - - RSHFCGGSILDADTVLTAAH
TAS IVGGFEIDVSETPYQVSLQYF - - - - - - - - - - - RSHRCGGSVLNKNKWLTAAH
TBT IVGGYTCAENSVPYQVSLNA - - - - - - - - - - - GYHFCGGS LINDQWVVSAAH
TSS IVGGYECKAYSQTHQVSLNS - - - - - - - - - - - GYHFCGGS LNVNENWVVSAAH
TDM IVGGSATTISSFPWQISLQRS - - - - - - - - - - - SHSCGGS IYSANII VTAAH
TLS1 IVGGEEAEPNAPFYQLSLRSGG - L - - - - - L - - SYHFCGAS IYDEKTAITA AH
TLS7 IVGGEEVEPN SIPFQV SFQTG - - - - - - - - - - - GFHF CGAS VMDKDT II TA AH
TNV VVGGYETSIEQHPPYQVSLRYKG - - - - - - - - - - - RHKCGGA IIAEDWVITA AH
TPC IVGGTEVTPGEIPYQLSFQDTS - F - - - - - GG - - EFHF CGAS IYKDTWAICAGH
TPV IVGGS DATP GELPYQLSFQDVS - F - - - - - GF - - AFHF CGAS IYNENWAICAGH
TPL IVGGTDASLGEFPYQLSFQEKF - L - - - - - GF - - SFHF CGAS IYNENYAITAGH
TRY1 IVNGEEVRDGEV TWQISL QLSS - AVSGENRQRT - MSHFCGGA IINSQWAITA AH
TRY2 IIGGADAKEG EFPMVSLQRNG - F - - - - - FG - - RSHFCAGS IADARSII TA AH
TRY3 IVGGEEALPNEFP FMVSMQSLA - V - - - - - GGT - - YNHRCGGA VINERWVVSASH
TRY4A IVGGTQATPNEFPWQISLQRRG - V - - - - - LSS - YSHSCGGSVYNNNYIIDASH
TRY4B IVGGTQASPNEFPYQISLRRLG - - - - - - - - - - - SHICGAS IYKSGWII TA AH
TRY5A IINGGEVVPYSLPFVVTIQTKT - - - - - - - - - - - GNT - FTHLCAGS ILDESTILTSAG
TRY5B IVGGSEVVPNSLPFQISLQRRS - - - - - - - - - - - FGG - FSQSCGGS ILNENTILDAAH
TRY5K IVGGSEVVPNSLPFQISLQRRS - S - - - - - FGG - FSHSCGGS ILNENTILNAAH
TRY5C IVGGKEVVPNSLPFQISLQRKS - A - - - - - SGI - FSQSCGGS ILNENTILDAAH
TRY5D IVGGAEVVPNSLPFV VSLQRKF - L - - - - - T-L - STHACAGT ILDEKTI LTA AH
TRY5E IVGGAVVEPN SLPFQV SLQRLS - GT - - - - - TGQ - YSQSCGGS ILDDSTILNAAH
TRY5F IVGGAVVAPNSLPFQVSLQRRG - S - - - - - TGS - FSQSCGGS ILDANVII DA AH
TRY5L IVGGVIVEPN SLPFQV SLQRRG - S - - - - - TGT - FSQSCGGS ILDENVILDA AH
TRY5G IVGGTEVEPN SLPFQV SLQRKG - L - - - - - TGL - YSQSCGGS ILDENTILDAAH
TRY5I IIGGVEVVPNSLPFQV SIQRGS - - - - - - - - - - - AGV - YTQSCGGS ILNETTVLTA AH
TRY5H ILSGSEVVPNSLPFQVSLQRRG - L - - - - - NGA - YVQVGGGS ILDDSTILHAAH
TRY5J IVGGTEVAPNSLPFQISLQRRG - LL - - - - - PNSA - YSHICGGS ILDATTILDA AH
TRY5M IVGGTIVVPNSLPFQVSIQRSS - D - - - - - AGSRW - AHYCGGVILDANV VITA AH
TTC IIGGSSISISSVPWQVSLQYYG - - - - - - - - - - - SHICGGS IISAKYIVTA AH
ChBT IVNGEEAVPGSWPWQVSLQDKT - - - - - - - - - - - GFHF CGGS LINENWVVTAAH
ChPO IVNGEEALPHSWPWQVSLQDYT - - - - - - - - - - - GFHF CGGS LINENWVVTAAH
```

```
cons ::.* . : : : : : : : . . : : .
```

PSS CVEGM---NPSDLRILAGEHNFKKEDGTEQWQDVIDIIMHKDYVYSTLENDIAL  
 TAAe CAASG---QTNLQVRIGSSQ--HASG-GQLIKVKKVNRHPKYDEVTTDYDFAL  
 TAFi CTDGQ---VPSGITVVAGDHVLSSTTDGDEQVVGVASISEHPEYNSRTFYNDICV  
 TAS CTDGL---DASSLSVRLGSSK--HASG-GTVVRVARIVEHPKYDGNTIDHDYCL  
 TBT CYQ-----YHIQVRLGEYNIDVLEGGEQFIDASKIIRHPKYSSWTLNDILL  
 TSS CYK-----SRVEVRLGEHNIKVTEGSEQFISSSRVIRHPNYSSYNIDNDIML  
 TDM CLQSV---SASVLQVRAGSTYWSS---GGVVAKVSSFKNHEGYNANTMVNDIAV  
 TLS1 CCQNL---PKYAKVVAGDHSQHSVSGFEQKIRVKSYVIHPDFGTSGVNNDICI  
 TLS7 CCDSF---FPWEVQVVAGEHDLFSTSGDEQTIDVSDITYHEMFASHGTNYDVCL  
 TNV CLKSS---NPSHLSIKAGSSTL--GGRGQVVDVHHVIRHEDYSRRESDYDIAL  
 TPC CVQGEDFDFSPASLQIVAGDHTLYSAEGNEQKIAVSKIIQHEDYNGFISISNDISL  
 TPV CVQGEDMNNPDYLVQVVAGEHNRDVEGNEQTVVLSKIIQHEDYNGFTISNDISL  
 TPL CVYGDYDNP SGLNIVAGELDMSVNEGSEQTIAVSKII LHENLDYD LLDNDISL  
 TRY1 CVYQK--MYITSDNLFVVFNTTNMKLPLDAANIGVEK-IFSANYNEDTKENDLAL  
 TRY2 CLEEL--H-PIGVWAVAGEHRLDLVSGFEQELRAAQFVLHEEYDPDYLRNDIGI  
 TRY3 CTENA--L-VGATRIAAGEHSLSTTSQFEQFSDVEMFVMHPNYDTVTLENDIVL  
 TRY4A CVDGV--TDVGTLRVVAGEHSLTQTSGYEQIRSVLSYKMHESYNSNTFANDIAL  
 TRY4B CTDGT---AVGSLIVAGEHSLINSNGNEQTRNVAAKHEHVSYSRRTQENDICL  
 TRY5A CVANQ--A-TRNLQVVASEHSLGTISGEEQNRLVASILPNAAYDANTNERDIAI  
 TRY5B CVDGV--TDLTIFRVVAGEHSLSVVSGLEQNRDVSGLMHPDYDTSTSSNDIAL  
 TRY5K CVVGI--TDLTIFRVVAGEHSLSVVSGLEQNRDVSEYLMHPDYVQRTFFNDIAL  
 TRY5C CVDGV--ADVSIFRVVAGEHDLFQVSGLEQNMVNNILMHPDYNKKTSENDIAL  
 TRY5D CLDY---DNATIFRVVAGEHSFLNESGMEHNSNVDSYLMHPDYSPITLENDIAL  
 TRY5E CVRGV--D-PASMLIVAGEHSLSQESGLEQNRVINTTVHEKYDFLTYENDISL  
 TRY5F CVRGV--TDLTIFRVVAGEHSLRTDSGLEQNRVTRFVMHENVYKPLTFENDISL  
 TRY5L CVRGI--TDLTIFRVVAGEHSLRNVSQLEQNRGVTRFVMHENFRPSTFENDICL  
 TRY5G CVDGA---NIPNLRIVAGEHSLSVESGLEQNRVLVTRVATHPRYNSATYEDDISL  
 TRY5I CVDGA---VIRALRVVAGEHSLNDKSGLEQNRDVAFYSMHPRYTASTWEDDIAL  
 TRY5H GVVGI--MSLVEYRIVAGEHSLSVDSGLEQIRAVSSIVTHPNFDDITYEDDISL  
 TRY5J CVDGA---NVARLRVVVGEHSQTQASGLEQISAVSSFTMHENYSSSTYENDISL  
 TRY5M CVSGI--D-DTSLRVVAGEHSLSTDSGYEQDAFPVSVFVHEEYDTHFKNDIAL  
 TTC CTDGL--T-AAQLSIRAGTSSRGS---GGQVSSVARIYQHSSYNSRTIDYDISI  
 ChBT CGV-----TTSDVVVAGEFDQGSSEKIQLKIAKVFKNKYNSLTINNDITL  
 ChPO CNV-----RTSHRVILGEHDRSSSAEDIQVMKVGKVFKHPRYNGYTINNDILL

cons  \*

```

PSS      LKLA-EPLDL---TP TAVGSIICLPSQNNQ--EFSGHCIVTGWGSVR--EGG--
TAAe     LELE-ETVTF---S-DSCAPVKLPQKDTPVN--EGTCLQVSGWGNTQ--NPS--
TAFi     LKLL-NSIII---G-GNVQPVGLPFPNAEVD--EGVMATVSGWGTTT--AGG--
TAS      LELE-SELTF---S-NAVQPIALPEQDEPV--VDGTMATVSGWGNTQ--SAT--
TBT      IKLS-TPAVI---NA-RVSTLLLPSACA---SAGTECLISGWGNTL--SSGV--
TSS      IKLS-KPATL---NT-YVQPVALPTSACA---PAGTMCTVSGWGNTM-S-ST--
TDM      IRLS-SSLSF---S-SSIKAISLATY---NPANGASAAVSGWGTQS--SGSS-
TLS1     LHLE-NPLEL---ND-KVAKIAMPDQDQEFEG---EAVISGWGTTT--SGA--
TLS7     LKLL-SSLHF---N-EKVKPIALPEKDQEF--IG-DVVVSGWGTTT--SSGP-
TNV      LQLE-SPLAL---G-SKIQPIELAEAAADYYS--TGSKASVTGWGVVE--SSG--
TPC      LQFA-SPLTF---N-SFVGPIALPAQGG---VASGDCTCTGWGTTT--EGG--
TPV      LQLS-QPLSF---N-DFVAPIALPEAGH---AASGDCIVSGWGTTT--EGG--
TPL      LKLA-TPLTF---N-NNVAPIALPAQGH---TATG-NVIVTGWGTTT--EGR--
TRY1     LKLL-GSIYN---VTESFIAVSLPSES---FQPSG-DCVVSGWGYQR-ANAG--
TRY2     IRLN-GAFVF---N-SFLKQVKLPRSGYFT--FPDTAVTVAGWGTTK--EGG--
TRY3     IKLI-TPLDF---SSGKVSPISLPAMQE--TAAGTNVTVTWGNLE-FNNP--
TRY4A    LKLS-SPLDY---STGKVGAINLPAQGATIE--TGTTCLVTGWGTTIAGGGG--
TRY4B    LELS-SPLTL---N-SVGVVVRIPAQGAQ--TAVGTNCVVSGWGTTT--SGGS-
TRY5A    VKLS-TPLVY---T-SKVAPVVLPPPLSELDPAGLDVTVIAGWGDTV-EVNG--
TRY5B    IYLA-SPLDL---SVPSAKAVNMPPPTSEFDPPAGTITTVSGWGTTT--SGG--
TRY5K    IYLA-SPLDL---SVPSAKAVNMPPPTSEFDPPAGTITTVSGWGRIS--TGG--
TRY5C    IYLA-APLDL---SVPSAKPINMPPATWEFDPPAGIVATVSGWGTTT--SGG--
TRY5D    IYLS-GPLNVLPFN-EAVQPINLAL-TGTADPEPGLSVTVAGWGTTT--ASG--
TRY5E    LFLE-SPLDL---SVPAARPILLPPPTTEEFDPPSGLLLTVSGWGTTT--LGG--
TRY5F    LFLD-APLDL---SVPEAQPVLLPPPTSELDPAGTIVTVSGWGTTT--SGG--
TRY5L    LFLD-APLDL---SVPEAKPVLLPPPTSELDPAGTIVTVSGWGTTT--YGG--
TRY5G    IFLD-SPLDL---SVPSAKAIALPPSTSELDPAGTVVTCVSGWGTTT--SGG--
TRY5I    IVLT-EPFDL---SVPSAKPVNLPPPTSEFDAPAGTVFTVSGWGTTT--YGGI-
TRY5H    IFLT-EPLDL---SVPSAKPIALPGPTAEFDPPAGFRVNVSGWGTTT--SDG--
TRY5J    IFVA-TPFDL---SVASARPVNLPAPTSEFDPPAGTITTVSGWGTTT--EGG--
TRY5M    IFMNQAPLDL---SVPSAKPINLPEPTSQYDPPAGTHVNVSGWGFTN--SASWS
TTC      LELS-SSLTL---G-SNVSPVSLPSSSTSWN--AGTSVLVTGWGTTT--EGSS-
ChBT     LKLS-TAASF---SQ-TVSAVCLPSASDDF--AAGTTCVTTGWGLTR-YTNA--
ChPO     IKLA-APAQM---NM-RVSPVCVAETSDF--AGGMKCVTSGWGLTR-HNAP--

```

```

cons     : .      : : .      : * * *

```

```

PSS      --NSPNILQKVSVPPLMTDEECSEY-Y-----NIVDTMLCAGY-AEGGKDA
TAAe     --ESSEVLRAAYVPAVSQKECHKAYLSF-----GGVTDRMVCAGF-KEGGKDS
TAFi     --SLSDVLLAVNVPVISDAEERGA-YGET-----DVADSMICAGDLANGGIDS
TAS      --ESNAVLRAANVPTVNQQECEKAYGQT-----PGITDQMLCAGY-QQGGKDA
TBT      --NYPDLLQCLVAPLLSHADCEAS-YPG-----QITNNMICAGF-LEGGKDS
TSS      --ADSNKLQCLNIPILSYSDCNNS-YPG-----MITNAMFCAGY-LEGGKDS
TDM      --SIPSQLQYVNVNIVSQQCASSTYGYG-----SQIRNTMICA--ASGKDA
TLS1     --PPSFLLRWAKVNIVSKAECQNA-YGS-----RIDDSMICAAA--PGKDS
TLS7     --ASPVLKAVTVQVVSDEDCSDA-YYG-----SIDETMICA--PGKDS
TNV      --ELSNYLREVSVPPLISNSECSRLLYQQR-----RITERMLCAGYVGRGGKDA
TPC      --YSSDALLKVTMPIVSDADCRAS-YGES-----DIDDSMICAGV-PQGGKDA
TPV      --STPSVLQKVSVPPIVSDDECRDA-YGQN-----DIDDSMICAGM-PEGGKDS
TPL      --NTPDVLQKVTIPLVSDAECRSD-YGAD-----EIFDSMICAGV-PEGGKDS
TRY1     --TTPDHLMAANVTILADEDCQNR-FSP-----HYKIYPGMICAGG-KE--KDA
TRY2     --NLSNVLLKTTVPVVSDEDCRLI-YGAG-----LIVDSMLCAGY-TSGGYDS
TRY3     --NRPDVLNKGVIPTVSDLECRRS-YGPI-----DMFDSFICAGV-PEGGLDS
TRY4A    --SVSDVLRKAAVPIVSNSDCNMS-YGGN-----SILPSMLCAGF-VAGGIDS
TRY4B    --TIPDILRKVTVPVVSDDTCRGS-YGTN-----AITDSMICAGF-RLGGADS
TRY5A    --TSSDVLISATVPVIVADDVCNLA-YGGNEN--STIVFPDMMCTG--NGNADA
TRY5B    --SISNVLLSVDVPIVSDSDCNAA-YAGVFD--PNPIFPSMLCAGG-PPGGVDS
TRY5K    --SISNVLLSVDVPIVSDSDCNAA-YAGVFD--PNPIFPSMLCAGA-PAGGVDS
TRY5C    --SISNVLLSVDIPIISDDACNAI-YTDESEPKPKAIYESMLCAGG-PNGNVDS
TRY5D    --DRSDVLLSVDIPVVSDEDCNAA-YSGEYN--TDPVKPSMMCAGG-APGGLDA
TRY5E    --VISDQLRSVDVPVVDATCNYA-YGGSTQ--NPDVFPSPMICAGDMSAVQTFQ
TRY5F    --VISDQLRSVDVPVVDVDDVCNRA-YGGTAA--SPQVYPSMLCAGDISNGGIDS
TRY5L    --AASDELRSVDVPVVDVDDTDCNRA-YGGTAA--NPEVFPSPMMCAGDTSNGGIDS
TRY5G    --SISDVLRSDVPIVSDADCDAA-YGGTAS--SPSVYPSMICAGDTTNGGIDS
TRY5I    --LVSDVLLSVDVPVVDVDCDAY-YGGTSQ--KPEVYPSMLCAGNTTDGGIDA
TRY5H    --DVSDVLRSLVVPVVPDFDCDAA-YGGDGV--YIAVFPSMVCAGDVTSTRIPY
TRY5J    --SVSDTLLSVDIPIVISDADCNTA-YGGN-----AVFSSMMCAGGP-NGGIDS
TRY5M    DDRLSDLLRSVNISVVSDDQVCDKA-YGGDSE--NRIVLPSMMCAGDMKKGGGLDS
TTC      --SLPSALQGVTVQIVSQSTCSSA-YGSGS-----ITGRMLCAG-VTNGGKDA
ChBT     --NTPDRLQQASLPLLSNTNCKKY-WGT-----KIKDAMICAGA--SGVSS
ChPO     --DTPALLQQAALPLLTNDDCRRY-WGN-----KISNLMICAGA--SGASS

```

```

cons      * : * : : : : . * : .

```

|       |             |            |        |           |              |              |               |              |              |           |
|-------|-------------|------------|--------|-----------|--------------|--------------|---------------|--------------|--------------|-----------|
| PSS   | CQGDSGGPLVC | ---        | PNGDGT | Y         | SLAGIVSWG    | --           | IGCAQPRNPGVY  | TQVSKFLDW    |              |           |
| TAAe  | CQGDSGGPLVH | ---        | DN     | -         | TLVGVVSWG    | --           | YGCAQAGYPGVY  | ARVASVRDW    |              |           |
| TAFi  | CQGDSGGPLYM | ---        | GS     | ---       | TIIGIVSWG    | --           | YGCAAYAGYPGVY | TQVSYVVSF    |              |           |
| TAS   | CQGDSGGPLVA | ---        | DG     | -         | KLIGVSWG     | --           | FGCAQAGYPGVY  | SRVASVREW    |              |           |
| TBT   | CQGDSGGPVAC | ---        | NG     | -         | QLQGIVSWG    | --           | YGCAQKGGKPGVY | TKVCNYVDW    |              |           |
| TSS   | CQGDSGGPVVC | ---        | NG     | -         | ELQGVVSWG    | --           | YGCAEPGNPGVY  | AKVCIFNDW    |              |           |
| TDM   | CQGDSGGPLVS | ---        | G      | ---       | VLVGVVSWG    | --           | YGCAYSNYPGVY  | ADVAVLRSW    |              |           |
| TLS1  | CQGDSGGPMVC | ---        | DG     | -         | VQCGIVSWG    | --           | YGCADPKYPGVY  | AKLSKFMDW    |              |           |
| TLS7  | CQGDSGGPLAQ | ---        | DG     | -         | TLVGIIVSWG   | --           | YGCAAPGYPGVY  | GKVSKFIDW    |              |           |
| TNV   | CQGDSGGPLVQ | ---        | DG     | -         | KLIGIVSWG    | --           | FGCAEPNYPGVY  | TRVTALRSW    |              |           |
| TPC   | CQGDSGGPLAC | ---        | SDTGSP | -         | YLAGIVSWG    | --           | YGCARPNYPGVY  | CEVAYVVDW    |              |           |
| TPV   | CQGDSGGPLAC | ---        | SDTGST | -         | YLVGIIVSWG   | --           | YGCARPNYPGVY  | AEVSYHVDW    |              |           |
| TPL   | CQGDSGGPLAA | ---        | SDTGST | -         | YLAGIVSWG    | --           | YGCARAGYPGVY  | TEVSYHVDW    |              |           |
| TRY1  | CQGDSGGPLVC | KSS        | -      | TGQN      | -            | VLTGIVSWG    | --            | IGCATPTIPGVY | TKVAKYMDW    |           |
| TRY2  | CQGDSGGQLML | ---        | G      | ---       | DK           | -            | TLVGIIVSWG    | --           | KGCGQPDYPGVY | TEVSAYIGW |
| TRY3  | CNGDSGGPLFT | ---        | SDPQ   | --        | QLIGIVSWG    | --           | KDCALPGYYGVY  | TEVSYFSDW    |              |           |
| TRY4A | CQGDSGGPLVT | ---        | LN     | --        | PN           | -            | VLVGVVSWG     | --           | NGCANPGYPGVY | TRVASFTNW |
| TRY4B | CQGDSGGPLV  | ---        | DEGTN  | -         | LLIGVSWG     | --           | IGCADAGYYGVY  | TEVSYFHNW    |              |           |
| TRY5A | CNRDLGGPLFT | ---        | GTGAEA | -         | VIHGIIISWG   | --           | IGCGASSYPDAYT | QVSYFLDW     |              |           |
| TRY5B | CQGDSGGPLFT | ---        | GTGADA | -         | VQHGIIVSWG   | --           | IGCAQAAYPGVY  | TQVSYFLDW    |              |           |
| TRY5K | CQGDSGGPLFT | ---        | GTGADA | -         | VQHGIIVSFGPS | --           | AGCALAEYPGVY  | TQVSYFLDW    |              |           |
| TRY5C | CQGDSGGPFFI | ---        | GTGTNA | -         | IQLGVVSWG    | --           | RGCATGHYPGVY  | TQISYFLDW    |              |           |
| TRY5D | CQGDSGGPLFV | LPADGNVANV | -      | QQLGIVSWG | --           | RGCGLADYPGVY | TQLSYYLEW     |              |              |           |
| TRY5E | VELISGGPLFL | LPLDGNVTEA | -      | RQIGVSWG  | --           | RGCAISAFPGVY | TQVSYFLDW     |              |              |           |
| TRY5F | CQGDSGGPLFT | ---        | GTGASA | -         | VQHGIIVSWG   | --           | QGCALAGYPGVY  | TQVSFFLDW    |              |           |
| TRY5L | CQGDSGGPLFT | ---        | GTGASA | -         | VQHGIIVSFG   | --           | QGCALAAYPGVY  | TQVSFFLDW    |              |           |
| TRY5G | CQGDSGGPLFT | ---        | GTGETA | -         | VQHGIIVSWG   | --           | QGCALARFPGVY  | TQVSYFLDW    |              |           |
| TRY5I | CQGDSGGPLFS | ---        | GSGETA | -         | VQHGIIVSWG   | --           | KSCAEPQWPGVY  | TQVSYFVEW    |              |           |
| TRY5H | CQGDSGGPLFT | ---        | GTGETA | -         | VQHGIIVSWG   | --           | QSCTYSQFPGVY  | TQVSYFLDW    |              |           |
| TRY5J | CQGDSGGPLFT | ---        | GTGETA | -         | VQHGIIVSWG   | --           | QGCAQAAYPGVY  | TQVSYFLDW    |              |           |
| TRY5M | CQGDSGGPLFT | ---        | GSGETA | -         | VLYGIIVSWG   | --           | EGCALASYPGIYT | TQVSYFLDW    |              |           |
| TTC   | CQGDSGGPLVV | ---        | GN     | ---       | VLAGIVSWG    | --           | AGCGRPSYPGVY  | SNVPALRSF    |              |           |
| ChBT  | CMGDSGGPLVC | ---        | KKNGAW | -         | TLVGIIVSWG   | --           | SSTCSTSTPGVY  | ARVTALVNW    |              |           |
| ChPO  | CMGDSGGPLVC | ---        | QKAGAW | -         | TLVGIIVSWG   | --           | SGTCTPTMPGVY  | ARVTELRAW    |              |           |

cons      \* \* .      \* : : : \*      . . : : :



```

PSS      IRNTNIDGSNVIEFI-----I
TAAe     VKEVSG-----L
TAFi     IKSV-----
TAS      VRENSG-----V
TBT      IQETIAAN-----S
TSS      LTSTMASY-----
TDM      VVSTAN-----SI
TLS1     VKENV-----
TLS7     IVEHK-----
TNV      ISEIAG-----L
TPC      VLANS-----
TPV      IKANA-----
TPL      IKANAV-----
TRY1     INKIMA-----DN
TRY2     INMKLSTAEA-----SNNRNI-----S
TRY3     IAATIAAADA-----H
TRY4A    IKTNAV-----
TRY4B    IVSFAG-----
TRY5A    IAANRG-----
TRY5B    IMANRG-----
TRY5K    IAANKQ-----
TRY5C    INENLH-----
TRY5D    INQNMV-----PA
TRY5E    IAANRV-----
TRY5F    IAANRV-----
TRY5L    IATNRV-----
TRY5G    IAAARG-----
TRY5I    IALAMQ-----
TRY5H    IAANRR-----
TRY5J    IAANKI-----
TRY5M    IAANQRVYSNYFNWPHLRHLSTRPMPDSKHVRTVSTS
TTC      IQQTTG-----I
ChBT     VQQTLAA-----N
ChPO     MDQTIAN-----N

```

```

cons     :

```
